# Supplementary material for: Predicting Cardiovascular Disease Mortality: Leveraging Machine Learning for Comprehensive Assessment of Health and Nutrition Variables
Source: MDPI journal article supplement (doi:10.3390/nu15183937), 2023-09-11
Supplement: s1 [file s1]

**Table S1.** List of all variables included in the health model

| Variable name | Definition                                                                                                                  |
|---------------|-----------------------------------------------------------------------------------------------------------------------------|
| Age           | Age (years)                                                                                                                 |
| Alcohol       | Alcohol habits (1 if drink, 2 if quit, 3 if never)                                                                          |
| BMI           | Body mass index (kg/m <sup>2</sup> )                                                                                        |
| Ca            | Blood calcium (mg/dL)                                                                                                       |
| Dia BP        | Diastolic blood pressure (mmHg)                                                                                             |
| Diabetic      | Doctor told you have diabetes (1 if yes or borderline, 0 if no)                                                             |
| Education     | Education level (1 if less than high school, 2 if high school, 3 if some college/AA degree, 4 if college graduate or above) |
| eGFR          | Estimated glomerular filtration rate (mL/min/1.73 m <sup>2</sup> )                                                          |
| Fe            | Blood iron (ug/dL)                                                                                                          |
| GlycoHb       | Glycohemoglobin (%)                                                                                                         |
| Hb            | Hemoglobin (g/dL)                                                                                                           |
| HDL           | HDL cholesterol (mg/dL)                                                                                                     |
| Health ins    | Covered by health insurance (1 if yes, 2 if no or unknown)                                                                  |
| K             | Blood potassium (mmol/L)                                                                                                    |
| LDH           | Lactate dehydrogenase (U/L)                                                                                                 |
| Men Health    | Days of bad mental health in the last 30 days (days)                                                                        |
| Na            | Blood sodium (mmol/L)                                                                                                       |
| P             | Blood phosphorus (mg/dL)                                                                                                    |
| Phy Health    | Days of bad physical health in the last 30 days (days)                                                                      |
| Race          | Race (1 if Hispanic or other, 2 if non-Hispanic Black, 3 if non-Hispanic White)                                             |
| Sex           | Sex (1 if male, 2 if female)                                                                                                |
| Smoker        | Smoking habits (1 if smoker, 2 if quit, 3 if never)                                                                         |
| Sys BP        | Systolic blood pressure (mmHg)                                                                                              |
| Total Cho     | Blood total cholesterol (mg/dL)                                                                                             |
| Uric acid     | Blood uric acid (mg/dL)                                                                                                     |
| Waist         | Waist (cm)                                                                                                                  |

**Table S2.** List of all variables included in the nutrition model

| Variable name | Definition                                                                                |
|---------------|-------------------------------------------------------------------------------------------|
| Alc int       | Alcohol intake (g)                                                                        |
| Ca int        | Calcium (mg)                                                                              |
| Caff int      | Caffeine intake (mg)                                                                      |
| Cho int       | Cholesterol intake (mg)                                                                   |
| Cu int        | Copper intake (mg)                                                                        |
| Fe int        | Iron intake (mg)                                                                          |
| Fib int       | Dietary fiber (g)                                                                         |
| Fish int      | Eaten fish in the past 30 days (1 if yes, 2 if no/refused/unknown)                        |
| Fol int       | Total folate intake (µg)                                                                  |
| K int         | Potassium intake (mg)                                                                     |
| MFA int       | Total monounsaturated fatty acids intake (g)                                              |
| Mg int        | Magnesium intake (mg)                                                                     |
| Milk int      | Milk intake (1 if whole, 2 if low fat, 3 if skim, 4 if no or very low milk)               |
| Na int        | Sodium intake (mg)                                                                        |
| Nia int       | Niacin intake (mg)                                                                        |
| PFA int       | Total polyunsaturated fatty acids intake (g)                                              |
| Prot int      | Protein intake (g)                                                                        |
| Salt freq     | How often addsalt to food at table (1 if rarely, 2 if occasionally, 3 if very often)      |
| Salt prep     | Salt usage in food preparation (1 if never or rarely, 2 if occasionally, 3 if very often) |
| Salt table    | Adds salt at the table (1 if yes, 0 if no)                                                |
| SFA int       | Total saturated fatty acids intake (g)                                                    |
| Sug int       | Total sugars intake (g)                                                                   |
| Theo int      | Theobromine intake (mg)                                                                   |
| Vit A int     | Vitamin A intake (µg)                                                                     |
| Vit B1 int    | Thiamin (Vitamin B1) intake (mg)                                                          |
| Vit B12 int   | Vitamin B12 intake (µg)                                                                   |
| Vit B2 int    | Riboflavin (Vitamin B2) intake (mg)                                                       |
| Vit B6 int    | Vitamin B6 intake (mg)                                                                    |
| Vit C int     | Vitamin C (mg)                                                                            |
| Vit E int     | Vitamin E as alpha-tocopherol intake (µg)                                                 |
| Vit K int     | Vitamin K intake (µg)                                                                     |
| Wat int       | Total plain water drank (g)                                                               |
| Zn int        | Zinc intake (mg)                                                                          |

**Table S3.** General characteristics of the health model

| Variable                         | Control (n = 9490)  | CVD-death (n=216)   | P-value |
|----------------------------------|---------------------|---------------------|---------|
| Age, years                       | 43.0 [31.0,57.0]    | 68.0 [60.0,75.0]    | <0.001  |
| Sex                              |                     |                     | <0.001  |
| Male                             | 4600 (48.5)         | 148 (68.5)          |         |
| Female                           | 4890 (51.5)         | 68 (31.5)           |         |
| Race                             |                     |                     | 0.009   |
| Hispanic and Other race          | 3082 (32.5)         | 49 (22.7)           |         |
| Non-Hispanic Black               | 1565 (16.5)         | 42 (19.4)           |         |
| Non-Hispanic White               | 4843 (51.0)         | 125 (57.9)          |         |
| Health Ins                       |                     |                     | <0.001  |
| Yes                              | 7525 (79.3)         | 199 (92.1)          |         |
| No                               | 1965 (20.7)         | 17 (7.9)            |         |
| Education                        |                     |                     | <0.001  |
| Less than 9th grade              | 2004 (21.1)         | 72 (33.3)           |         |
| High school grade                | 2049 (21.6)         | 65 (30.1)           |         |
| Some college, AA degree          | 2817 (29.7)         | 40 (18.5)           |         |
| College grad                     | 2620 (27.6)         | 39 (18.1)           |         |
| Diabetic                         |                     |                     | <0.001  |
| No                               | 8646 (91.1)         | 161 (74.5)          |         |
| Yes                              | 844 (8.9)           | 55 (25.5)           |         |
| Smoker                           |                     |                     | <0.001  |
| Smoking                          | 1782 (18.8)         | 60 (27.8)           |         |
| Quit                             | 2207 (23.3)         | 77 (35.6)           |         |
| Never                            | 5501 (58.0)         | 79 (36.6)           |         |
| Alcohol                          |                     |                     | 0.208   |
| Current drinker                  | 1118 (11.8)         | 32 (14.8)           |         |
| Current non-drinker              | 8372 (88.2)         | 184 (85.2)          |         |
| Phy Health, days                 | 0.0 [0.0,2.6]       | 0.0 [0.0,4.0]       | 0.31    |
| Men Health, days                 | 0.0 [0.0,3.0]       | 0.0 [0.0,3.0]       | 0.197   |
| BMI, kg/m <sup>2</sup>           | 27.6 [24.2,32.0]    | 28.3 [25.6,32.1]    | 0.026   |
| Waist, cm                        | 97.8 (15.3)         | 104.8 (14.9)        | <0.001  |
| Sys BP, mmHg                     | 119.0 [110.0,128.3] | 131.0 [122.0,144.0] | <0.001  |
| Dia BP, mmHg                     | 70.7 (10.5)         | 69.5 (11.5)         | 0.125   |
| Total Cho, mg/dL                 | 197.7 (36.7)        | 197.8 (35.7)        | 0.993   |
| HDL, mg/dL                       | 53.0 (14.1)         | 51.1 (12.7)         | 0.032   |
| Hb, g/dL                         | 14.3 [13.4,15.3]    | 14.6 [13.7,15.2]    | 0.01    |
| GlycoHb, %                       | 5.4 [5.2,5.7]       | 5.7 [5.5,6.1]       | <0.001  |
| Ca, mg/dL                        | 9.4 (0.3)           | 9.5 (0.3)           | 0.162   |
| Fe, ug/dL                        | 86.7 (30.8)         | 84.0 (28.0)         | 0.157   |
| P, mg/dL                         | 3.8 (0.5)           | 3.7 (0.5)           | 0.005   |
| K, mmol/L                        | 3.9 [3.8,4.1]       | 4.0 [3.9,4.2]       | <0.001  |
| LDH, U/L                         | 127.3 (21.3)        | 138.5 (20.5)        | <0.001  |
| Na, mmol/L                       | 139.0 [138.0,140.0] | 139.7 [139.0,140.5] | <0.001  |
| Uric acid, mg/dL                 | 5.3 [4.4,6.1]       | 5.8 [5.3,6.7]       | <0.001  |
| eGFR, mL/min/1.73 m <sup>2</sup> | 103.3 (26.4)        | 81.4 (21.9)         | <0.001  |

Numerical values are presented as the mean (standard deviation) if the distribution is approximately normal, or as the median (interquartile range) if the distribution is skewed. For categorical variables, percentages are given. Discrepancies in characteristics were assessed through the implementation of the unpaired Student's t-test, Kruskal-Wallis test, or Chi-squared test.

**Table S4.** General characteristics of the nutrition model

| Variable         | Control (n = 9490)     | CVD-death (n=216)      | P-value |
|------------------|------------------------|------------------------|---------|
| Fish int         |                        |                        | 0.001   |
| Yes              | 7198 (75.8)            | 185 (85.6)             |         |
| No               | 2292 (24.2)            | 31 (14.4)              |         |
| Milk int         |                        |                        | 0.006   |
| Whole            | 1838 (19.4)            | 40 (18.5)              |         |
| Low fat          | 5136 (54.1)            | 123 (56.9)             |         |
| Skim             | 1141 (12.0)            | 11 (5.1)               |         |
| No/Very low milk | 1375 (14.5)            | 42 (19.4)              |         |
| Alc int, g       | 0.0 [0.0,7.0]          | 0.0 [0.0,3.8]          | 0.279   |
| Ca int, mg       | 882.8 [630.5,1214.4]   | 726.8 [516.9,959.0]    | <0.001  |
| Caff int, mg     | 101.0 [32.5,212.4]     | 128.5 [40.1,254.2]     | 0.027   |
| Cho int, mg      | 252.5 [165.5,382.5]    | 270.0 [165.2,380.9]    | 0.524   |
| Cu int, mg       | 1.2 [1.0,1.6]          | 1.1 [0.9,1.4]          | <0.001  |
| Fe int, mg       | 14.7 [11.1,19.5]       | 13.4 [10.1,17.9]       | 0.002   |
| Fib int, g       | 16.2 [11.7,22.4]       | 13.9 [10.7,18.0]       | <0.001  |
| Fol int, µg      | 389.0 [289.5,528.0]    | 344.2 [270.2,447.2]    | <0.001  |
| K int, mg        | 2656.2 [2090.1,3367.5] | 2509.0 [1948.5,3096.4] | 0.004   |
| Mg int, mg       | 289.0 [225.0,370.5]    | 260.0 [200.0,312.6]    | <0.001  |
| Na int, mg       | 3335.5 [2548.5,4307.4] | 2981.0 [2393.9,3766.9] | <0.001  |
| Nia int, mg      | 24.1 [18.3,31.5]       | 21.2 [16.5,27.0]       | <0.001  |
| MFA int, g       | 27.2 [19.5,36.9]       | 25.4 [18.7,31.1]       | 0.003   |
| PFA int, g       | 16.3 [11.6,22.4]       | 14.0 [9.7,18.4]        | <0.001  |
| SFA int, g       | 24.1 [16.9,33.1]       | 22.6 [16.1,29.7]       | 0.014   |
| Prot int, g      | 80.9 [62.8,102.9]      | 73.4 [58.8,86.6]       | <0.001  |
| Sug int, g       | 107.8 [74.6,150.5]     | 87.9 [61.3,130.9]      | <0.001  |
| Theo int, mg     | 12.0 [0.0,46.0]        | 5.0 [0.0,37.8]         | 0.008   |
| Vit B1 int, mg   | 1.6 [1.2,2.1]          | 1.4 [1.1,1.9]          | <0.001  |
| Vit B2 int, µg   | 2.0 [1.5,2.7]          | 2.0 [1.5,2.5]          | 0.143   |
| Vit B6 int, mg   | 1.9 [1.4,2.6]          | 1.7 [1.2,2.3]          | <0.001  |
| Vit B12 int, µg  | 5.0 [3.0,7.9]          | 4.6 [2.9,7.3]          | 0.338   |
| Vit C int, mg    | 73.8 [37.5,127.5]      | 68.4 [32.0,110.8]      | 0.047   |
| Vit E int, µg    | 6.9 [4.9,9.9]          | 5.6 [4.2,7.8]          | <0.001  |
| Vit K int, µg    | 71.0 [44.4,123.3]      | 57.5 [40.3,97.5]       | 0.001   |
| Zn int, mg       | 11.1 [8.2,14.8]        | 9.9 [7.8,14.1]         | 0.033   |
| Wat int, g       | 843.9 [355.5,1480.7]   | 710.6 [266.6,1306.4]   | 0.029   |
| Salt freq        |                        |                        | 0.97    |
| Rarely           | 5809 (61.2)            | 131 (60.6)             |         |
| Occasionally     | 2115 (22.3)            | 48 (22.2)              |         |
| Very often       | 1566 (16.5)            | 37 (17.1)              |         |
| Salt prep        |                        |                        | 0.041   |
| Never or rarely  | 2244 (23.6)            | 67 (31.0)              |         |
| Occasionally     | 3123 (32.9)            | 66 (30.6)              |         |
| Very Often       | 4123 (43.4)            | 83 (38.4)              |         |
| Salt table       |                        |                        | 0.562   |
| does not add     | 2706 (28.5)            | 66 (30.6)              |         |
| Adds             | 6784 (71.5)            | 150 (69.4)             |         |

Numerical values are presented as the mean (standard deviation) if the distribution is approximately normal, or as the median (interquartile range) if the distribution is skewed. For categorical variables, percentages are given. Discrepancies in characteristics were assessed through the implementation of the unpaired Student's t-test, Kruskal-Wallis test, or Chi-squared test.

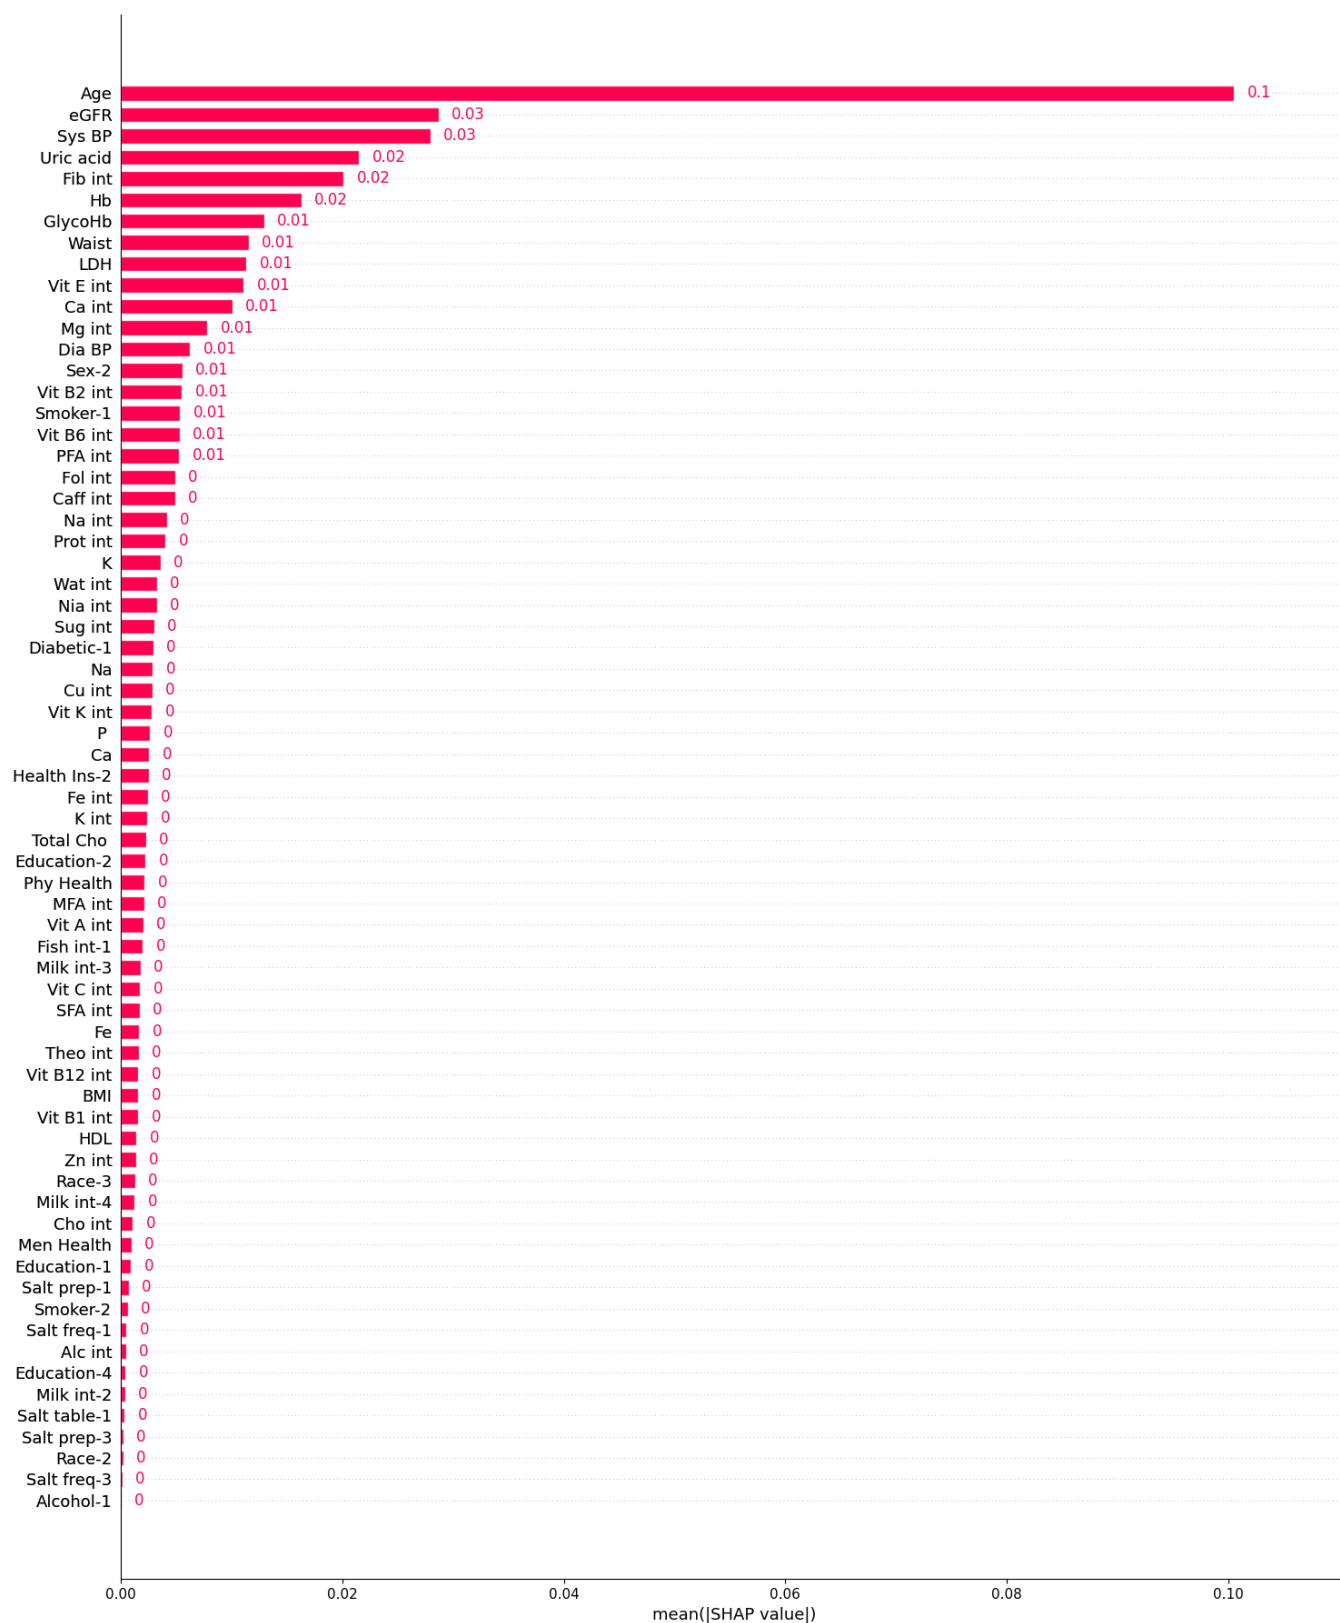

**Figure S1.** Feature importance from mixed model for cardiovascular disease death based on SHAP value distribution.

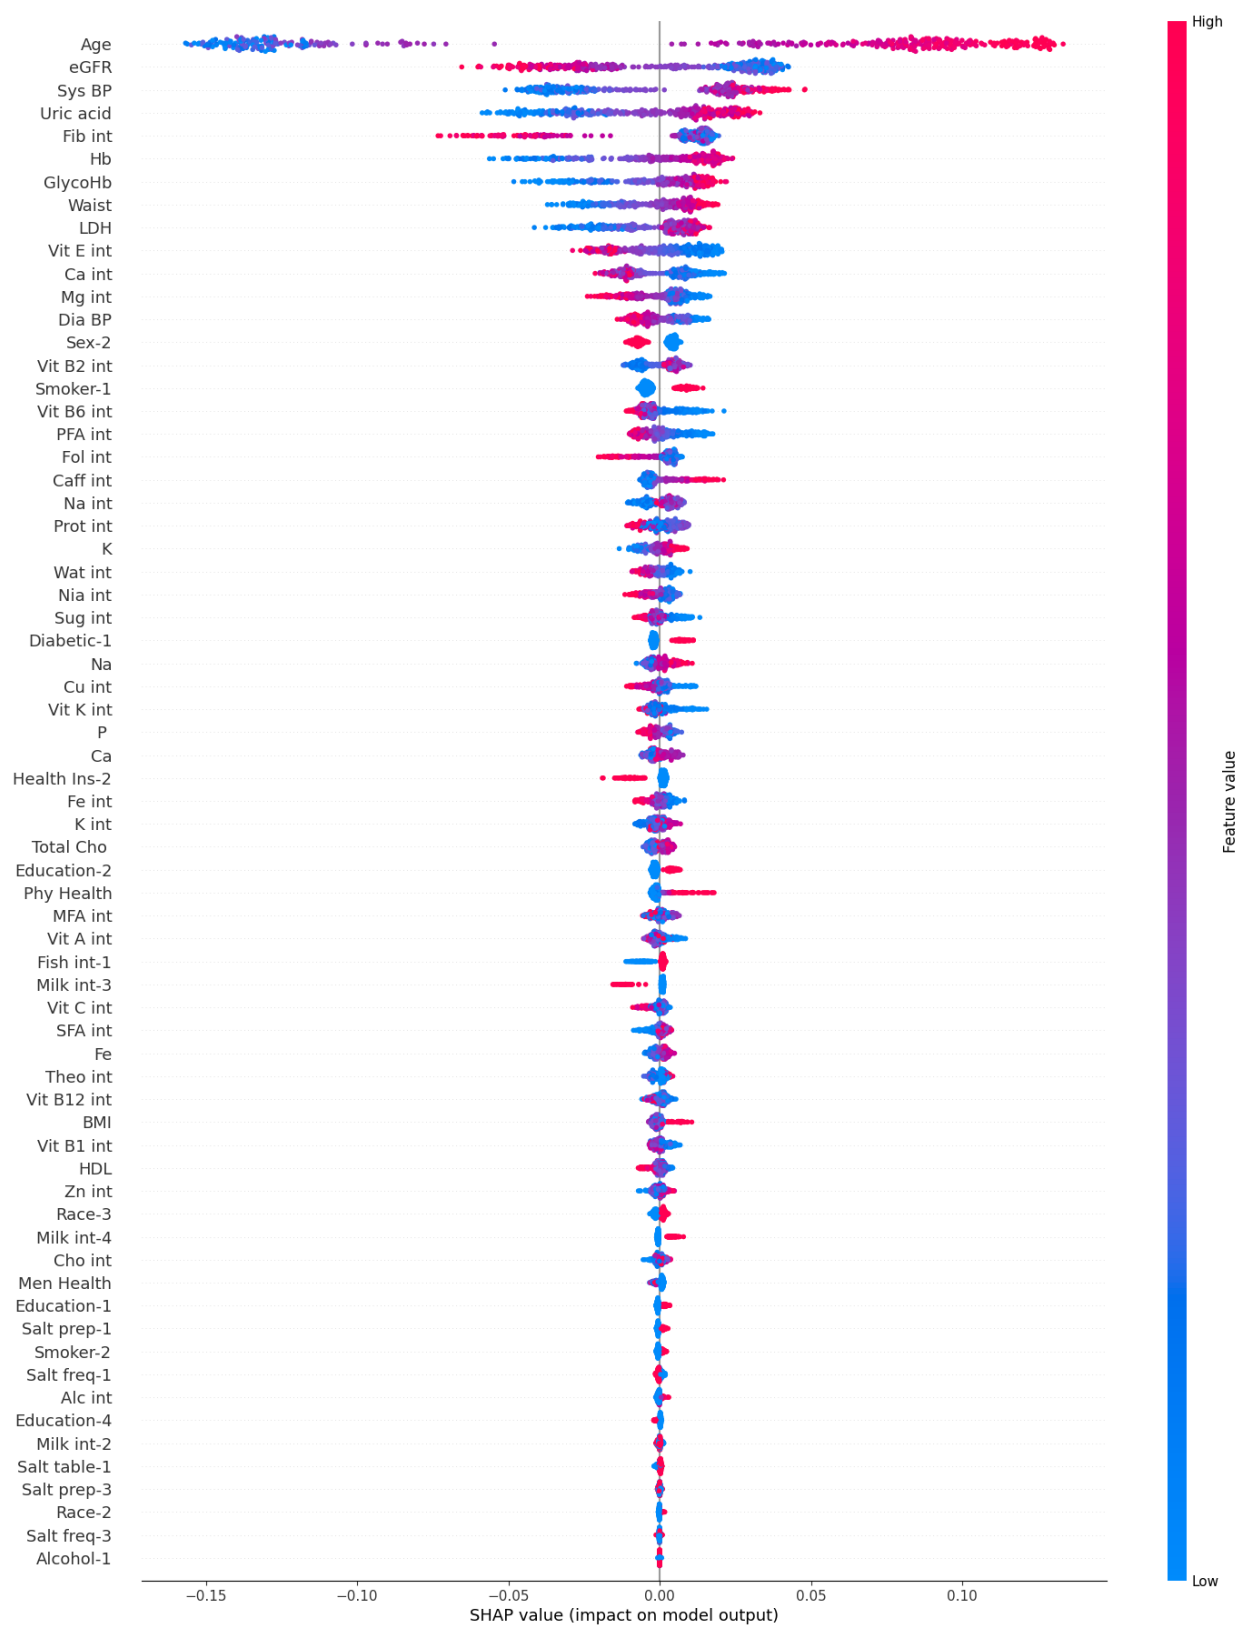

**Figure S2.** Feature importance from mixed model for cardiovascular disease death based on SHAP distribution values. Positive SHAP-values are indicative of positive correlation with CVD death, while negative SHAP-values are indicative of negative correlation.

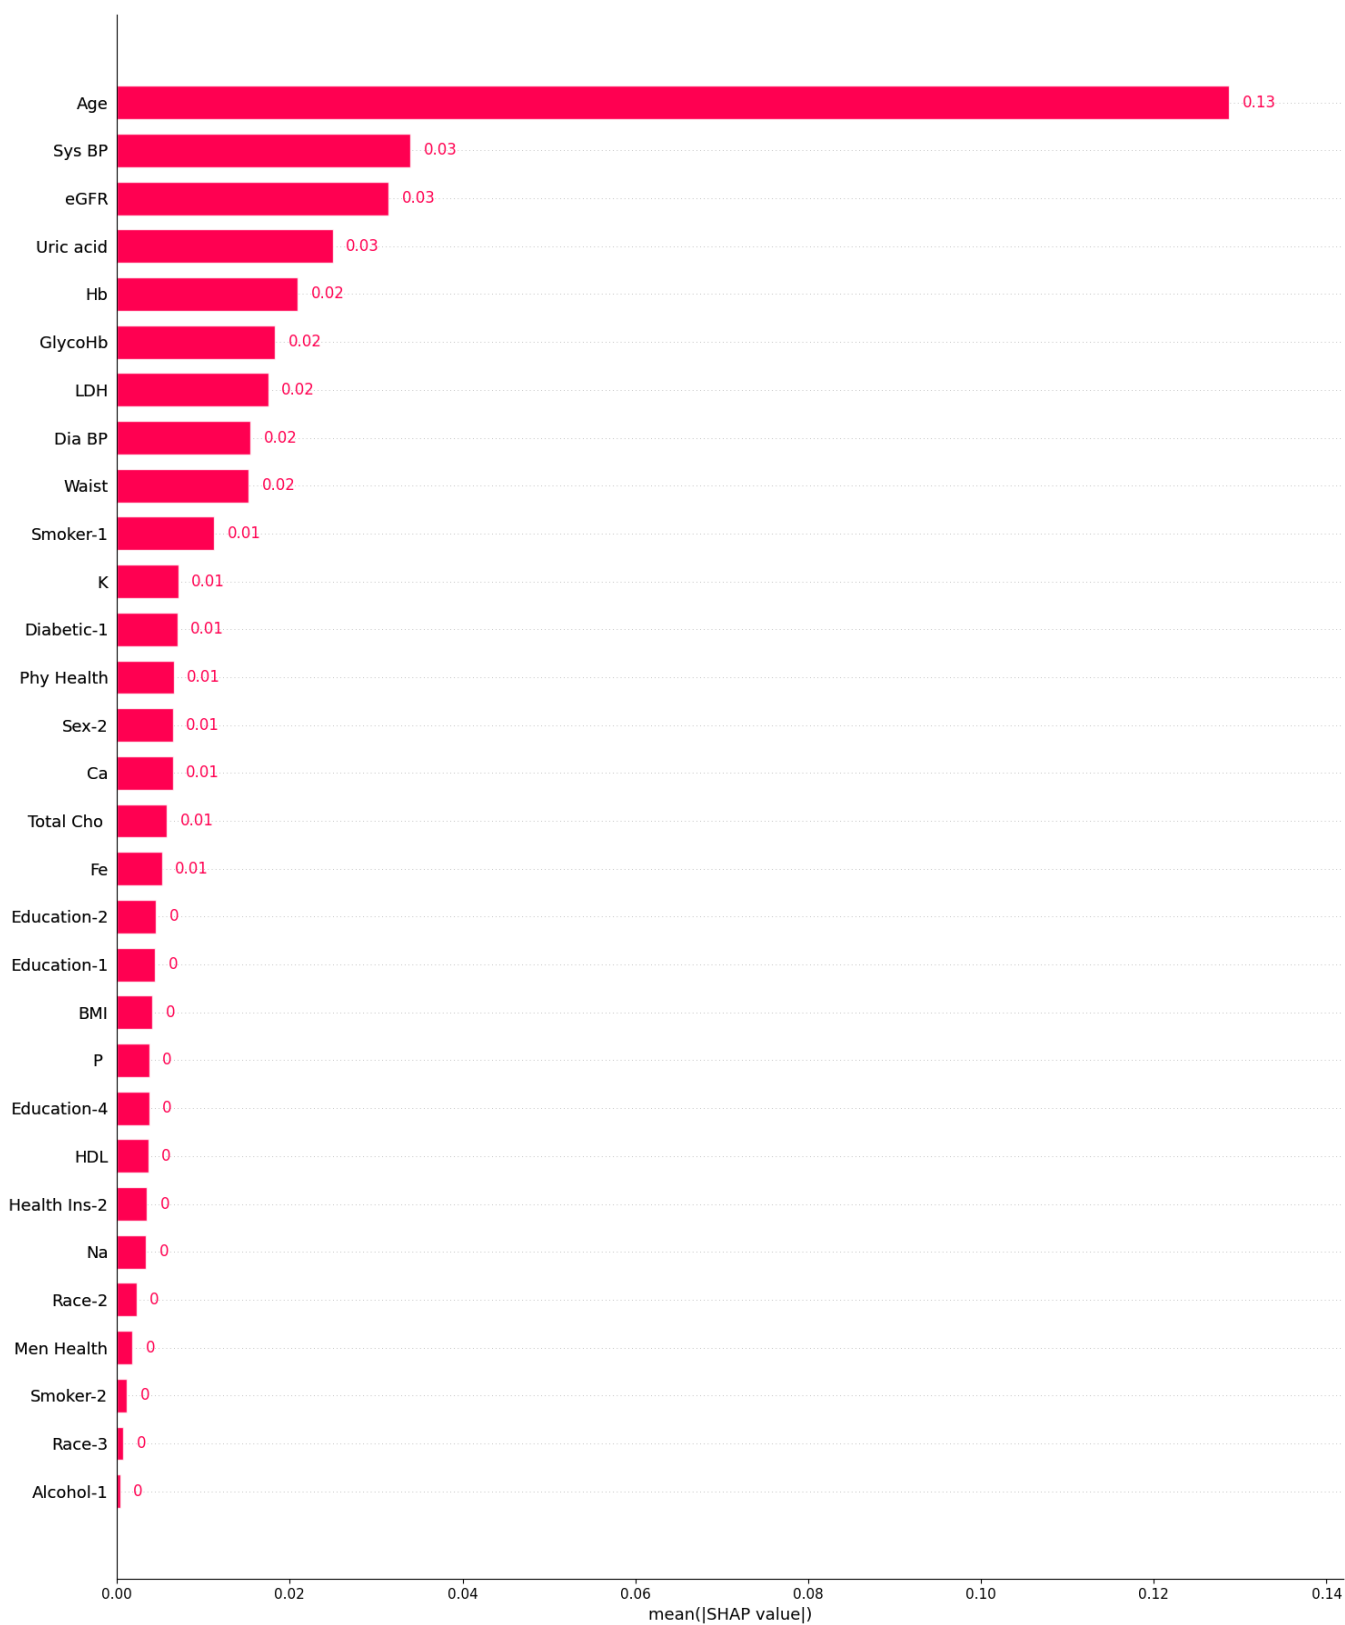

**Figure S3.** Feature importance from health model for cardiovascular disease death based on SHAP absolute values.

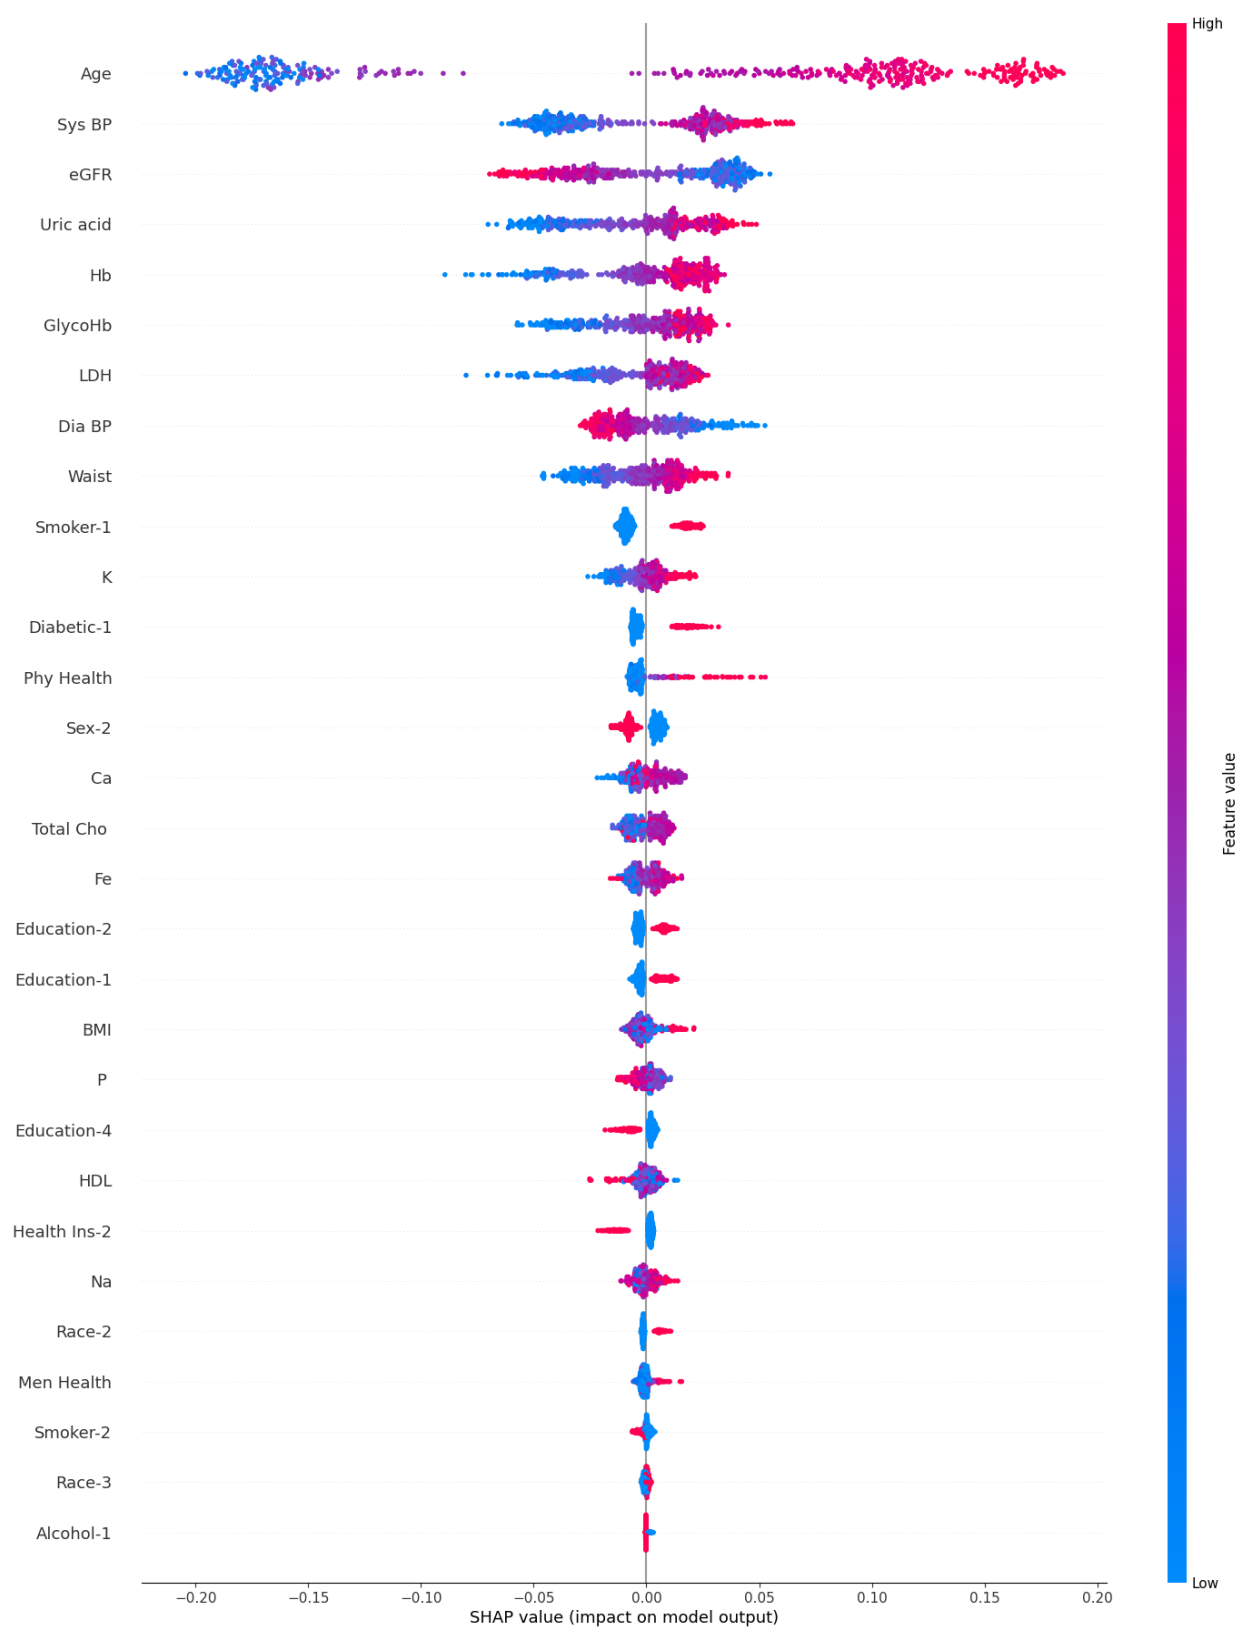

**Figure S4.** Feature importance from health model for cardiovascular disease death based on SHAP value distribution. Positive SHAP-values are indicative of positive correlation with CVD death, while negative SHAP-values are indicative of negative correlation.



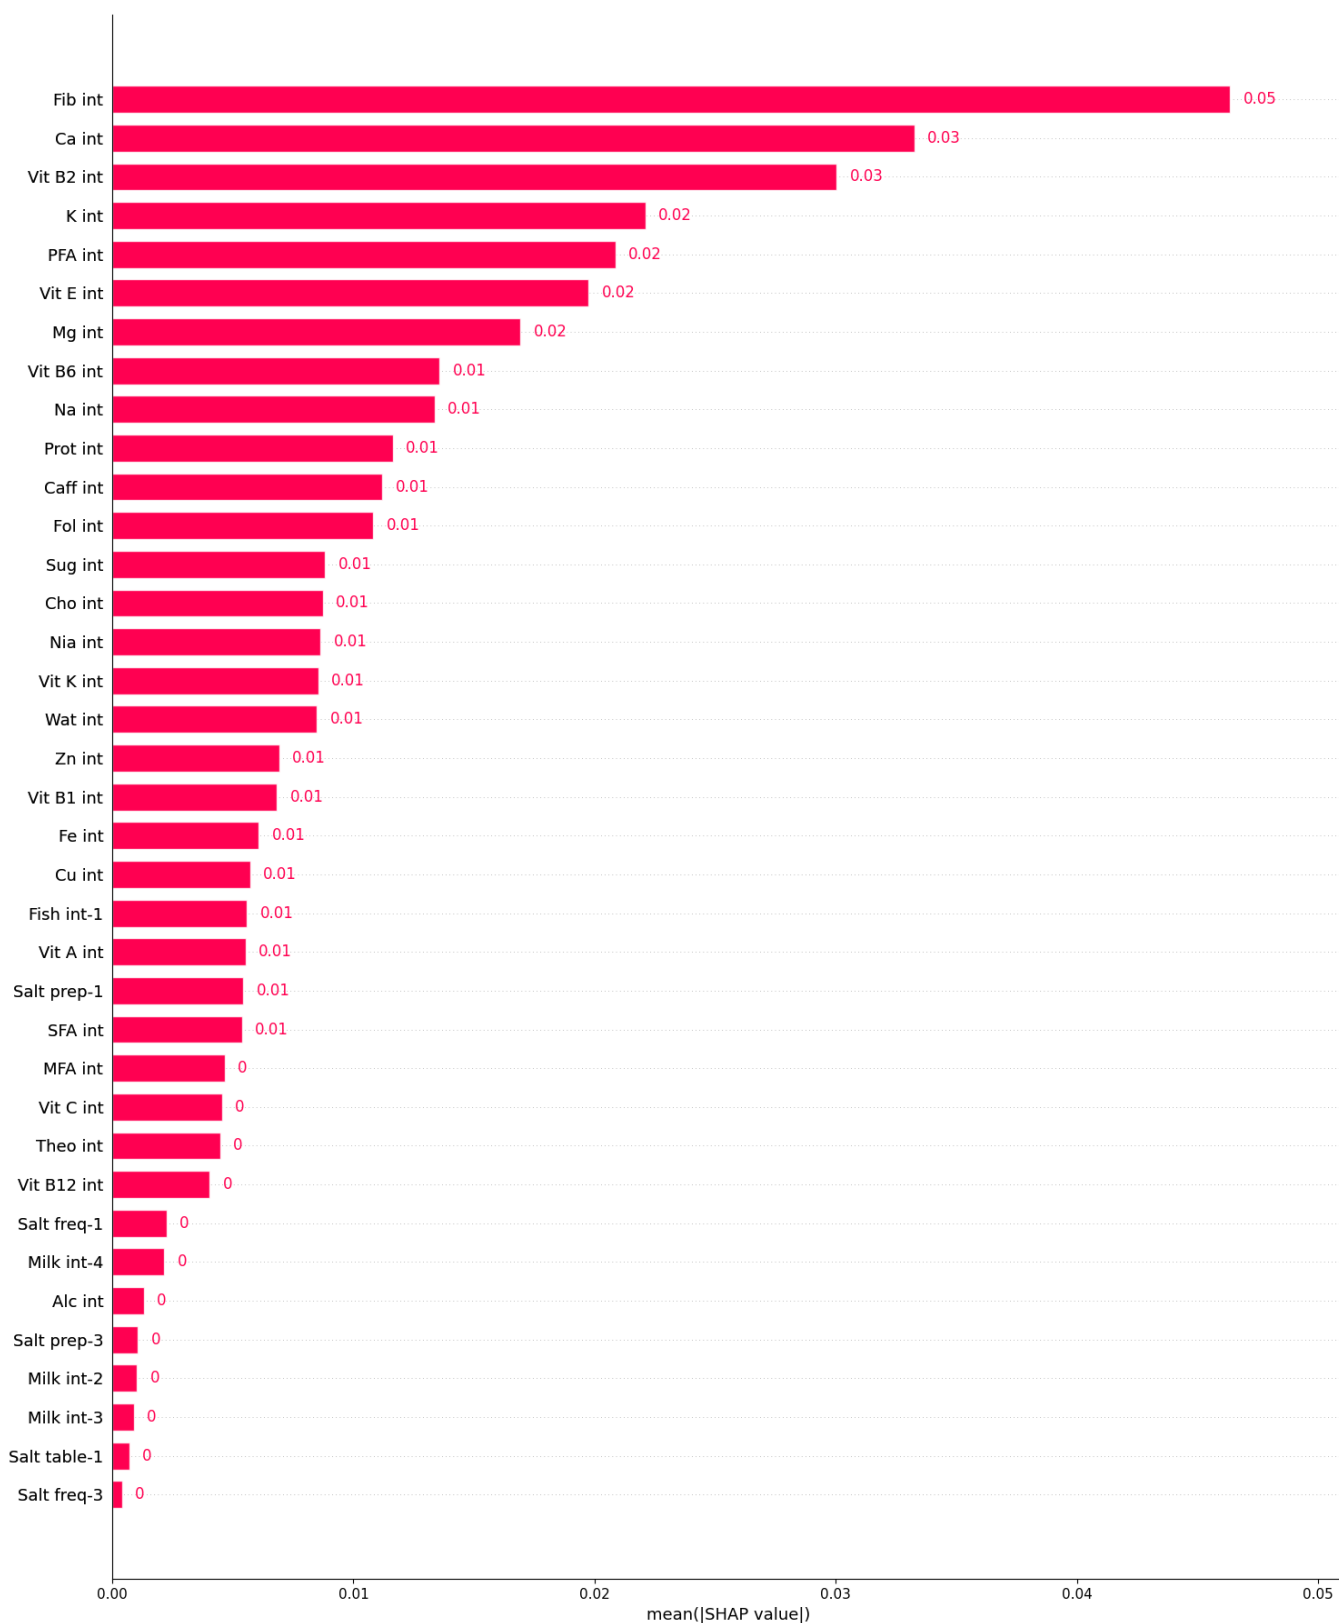

**Figure S5.** Feature importance from nutrition model for cardiovascular disease death based on SHAP absolute values.

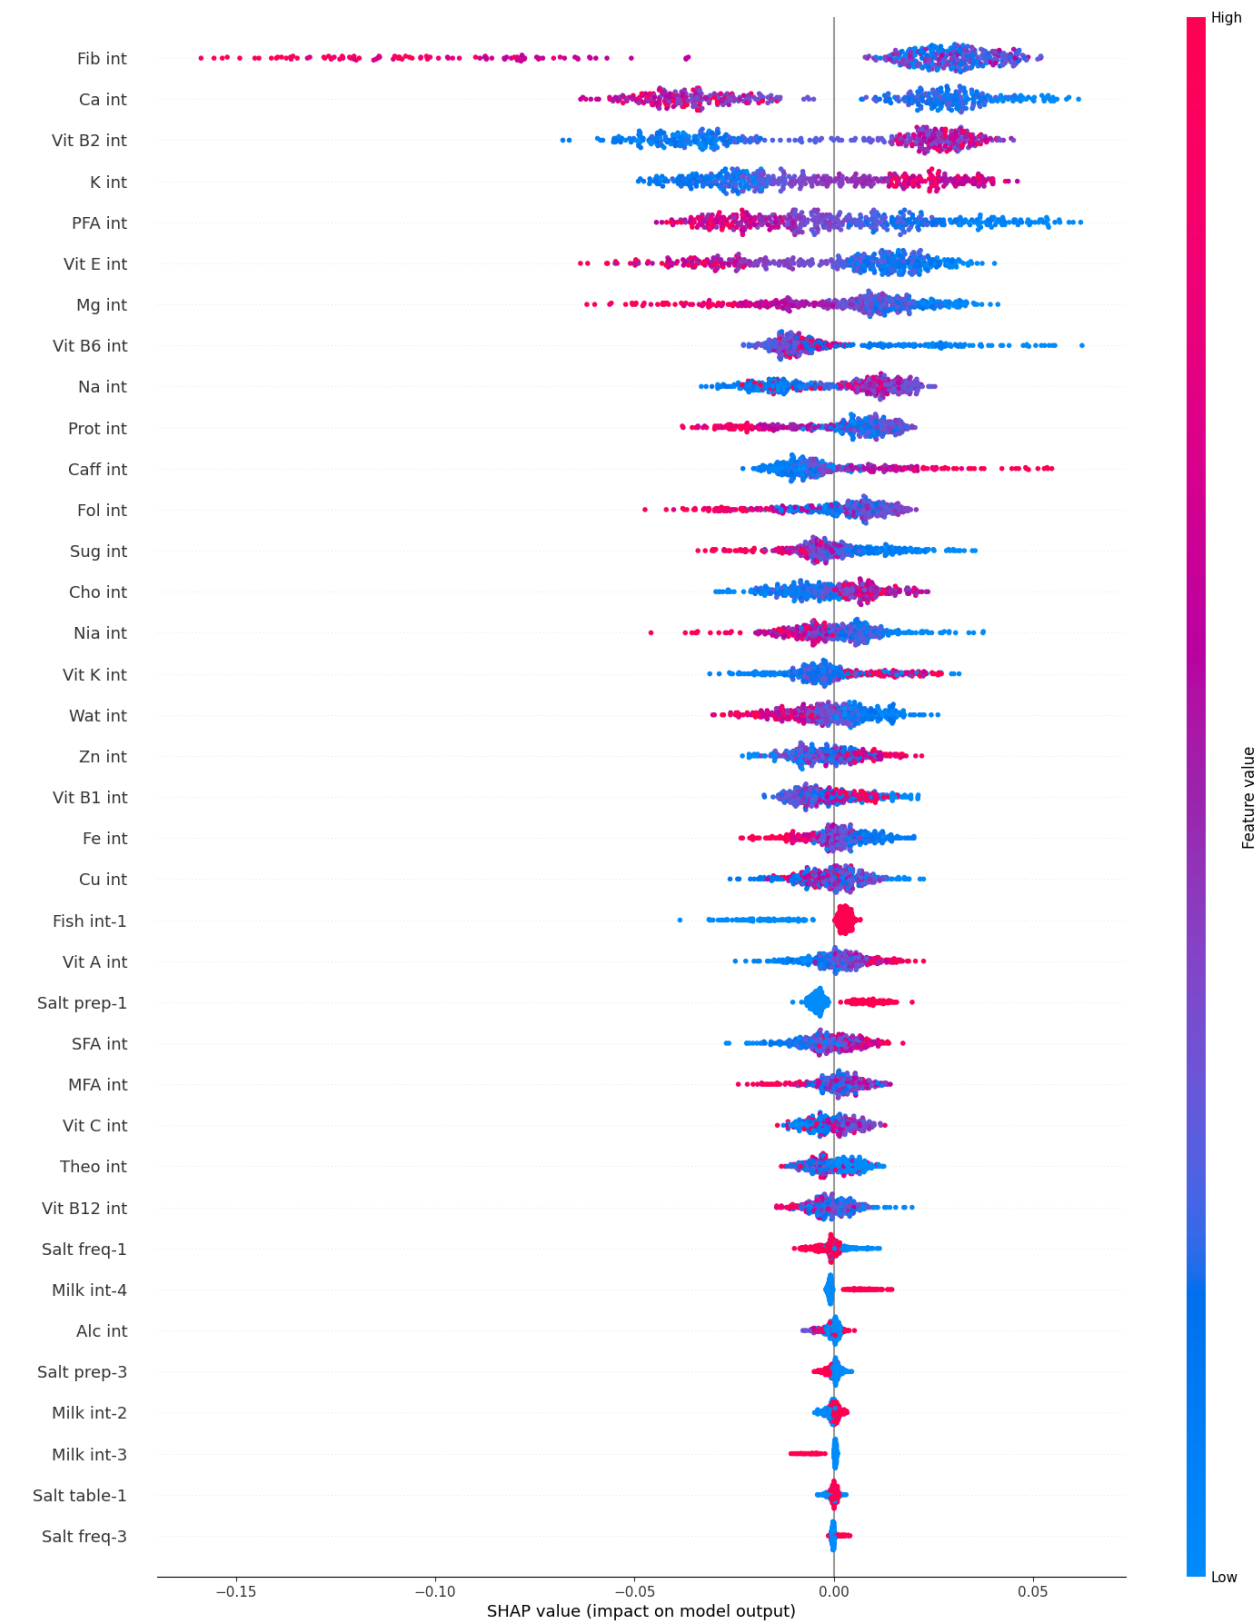

**Figure S6.** Feature importance from nutrition model for cardiovascular disease death based on SHAP value distribution. Positive SHAP-values are indicative of positive correlation with CVD death, while negative SHAP-values are indicative of negative correlation.
